# Supplementary material for: Physical Activity- and Alcohol-dependent Association Between Air Pollution Exposure and Elevated Liver Enzyme Levels: An Elderly Panel Study
Source: PubMed Central journal article supplement — J Prev Med Public Health. 2015 May 15;48(3):151–69. doi: 10.3961/jpmph.15.014 (PMC4484281; doi:10.3961/jpmph.15.014), 2015-05-15
Supplement: jpmph-48-3-151-supple1.pdf [file jpmph-48-3-151-supple1.pdf]

**Supplemental Table 1.** Concentrations of the air pollutants and meteorological factors in Seongbuk-gu, Korea (2008–2010)

|                     | PM <sub>2.5</sub> (µg/m <sup>3</sup> ) | NO <sub>2</sub> (ppb) | O <sub>3</sub> (ppb) | CO (10 ppm) | SO <sub>2</sub> (ppb) | Temperature (°C) | Dew point (°C) |
|---------------------|----------------------------------------|-----------------------|----------------------|-------------|-----------------------|------------------|----------------|
| Overall             |                                        |                       |                      |             |                       |                  |                |
| Mean ± SD           | 23.2 ± 11.5                            | 36.2 ± 12.0           | 47.6 ± 27.4          | 8.0 ± 4.3   | 3.9 ± 2.1             | 17.4 ± 8.1       | 6.4 ± 9.5      |
| Median              | 22.0                                   | 34.4                  | 41.0                 | 7.0         | 3.4                   | 19.6             | 7.8            |
| Range               | 5.0, 75.8                              | 9.8, 77.3             | 2.0, 140.0           | 3.0, 27.0   | 1.0, 13.9             | -7.2, 29.2       | -25.6, 21.9    |
| IQR                 | 13.2                                   | 14.4                  | 38.5                 | 4.0         | 2.3                   | 14.0             | 14.5           |
| Spring <sup>1</sup> |                                        |                       |                      |             |                       |                  |                |
| Mean ± SD           | 23.0 ± 10.3                            | 38.0 ± 12.5           | 41.7 ± 18.7          | 7.4 ± 2.5   | 3.9 ± 1.8             | 12.6 ± 5.2       | 0.8 ± 7.5      |
| Median              | 20.2                                   | 36.0                  | 37.0                 | 7.0         | 3.9                   | 13.4             | 1.3            |
| Range               | 6.6, 57.9                              | 12.8, 71.6            | 2.0, 101.0           | 3.0, 13.0   | 1.0, 9.8              | 1.8, 23.9        | -18.5, 16.1    |
| IQR                 | 11.1                                   | 20.1                  | 23.0                 | 5.0         | 2.4                   | 8.9              | 9.1            |
| Summer <sup>2</sup> |                                        |                       |                      |             |                       |                  |                |
| Mean ± SD           | 19.9 ± 11.4                            | 30.2 ± 7.6            | 62.9 ± 30.9          | 6.2 ± 2.0   | 2.9 ± 0.9             | 24.9 ± 2.0       | 14.4 ± 5.2     |
| Median              | 18.0                                   | 29.2                  | 61.0                 | 6.0         | 2.7                   | 24.9             | 15.8           |
| Range               | 6.0, 75.8                              | 16.6, 48.8            | 5.0, 140.0           | 3.0, 15.0   | 1.3, 7.1              | 19.1, 29.2       | -0.7, 21.9     |
| IQR                 | 15.5                                   | 10.0                  | 42.0                 | 2.0         | 1.1                   | 2.7              | 6.5            |
| Fall <sup>3</sup>   |                                        |                       |                      |             |                       |                  |                |
| Mean ± SD           | 23.7 ± 9.6                             | 36.7 ± 10.5           | 50.1 ± 25.1          | 8.0 ± 3.6   | 3.9 ± 1.9             | 19.8 ± 6.0       | 9.0 ± 6.1      |
| Median              | 24.0                                   | 36.1                  | 51.0                 | 7.0         | 3.6                   | 22.4             | 9.1            |
| Range               | 5.0, 54.0                              | 14.5, 77.3            | 8.0, 97.0            | 4.0, 18.0   | 1.4, 10.2             | 5.7, 25.6        | -15.2, 17.7    |
| IQR                 | 13.0                                   | 11.6                  | 49.0                 | 3.0         | 1.8                   | 6.4              | 7.1            |
| Winter <sup>4</sup> |                                        |                       |                      |             |                       |                  |                |
| Mean ± SD           | 32.2 ± 16.5                            | 45.5 ± 16.7           | 15.3 ± 10.1          | 15.2 ± 7.8  | 7.2 ± 2.7             | 3.5 ± 5.4        | -7.3 ± 8.6     |
| Median              | 33.0                                   | 50.2                  | 16.0                 | 16.0        | 7.4                   | 5.7              | -2.8           |
| Range               | 6.0, 65.0                              | 9.8, 65.9             | 2.0, 30.0            | 3.0, 27.0   | 2.6, 13.9             | -7.2, 9.4        | -25.6, 3.3     |
| IQR                 | 18.0                                   | 23.6                  | 23.0                 | 15.0        | 2.3                   | 6.8              | 8.7            |

PM<sub>2.5</sub>, particulate matter ≤2.5 µm; NO<sub>2</sub>, nitrogen dioxide; O<sub>3</sub>, ozone; CO, carbon monoxide; SO<sub>2</sub>, sulfur dioxide; IQR, interquartile range; ppb, parts per billion; ppm, parts per million; SD, standard deviation.

<sup>1</sup>March, April, or May.

<sup>2</sup>June, July, or August.

<sup>3</sup>September, October, or November.

<sup>4</sup>December, January, or February.
