# Supplementary material for: Physical Activity- and Alcohol-dependent Association Between Air Pollution Exposure and Elevated Liver Enzyme Levels: An Elderly Panel Study
Source: PubMed Central journal article supplement — J Prev Med Public Health. 2015 May 15;48(3):151–69. doi: 10.3961/jpmph.15.014 (PMC4484281; doi:10.3961/jpmph.15.014), 2015-05-15
Supplement: jpmph-48-3-151-supple2.pdf [file jpmph-48-3-151-supple2.pdf]

**Supplemental Table 2.** Correlation between the concentrations of air pollutants on the day of the study visit

|                              | <b>PM<sub>2.5</sub> (µg/m<sup>3</sup>)</b> | <b>NO<sub>2</sub> (ppb)</b> | <b>O<sub>3</sub> (ppb)</b> | <b>CO (10 ppm)</b> |
|------------------------------|--------------------------------------------|-----------------------------|----------------------------|--------------------|
| NO <sub>2</sub> (ppb)        | 0.6590                                     |                             |                            |                    |
| <i>p</i> -value <sup>1</sup> | <0.001                                     |                             |                            |                    |
| O <sub>3</sub> (ppb)         | 0.0753                                     | -0.1512                     |                            |                    |
| <i>p</i> -value <sup>1</sup> | <0.05                                      | <0.001                      |                            |                    |
| CO (10 ppm)                  | 0.6541                                     | 0.6993                      | -0.2994                    |                    |
| <i>p</i> -value <sup>1</sup> | <0.001                                     | <0.001                      | <0.001                     |                    |
| SO <sub>2</sub> (ppb)        | 0.5777                                     | 0.6164                      | -0.2267                    | 0.7237             |
| <i>p</i> -value <sup>1</sup> | <0.001                                     | <0.001                      | <0.001                     | <0.001             |

PM<sub>2.5</sub>, particulate matter ≤2.5 µm; NO<sub>2</sub>, nitrogen dioxide; O<sub>3</sub>, ozone; CO, carbon monoxide; SO<sub>2</sub>, sulfur dioxide; ppb, parts per billion; ppm, parts per million.

<sup>1</sup>Pearson correlation coefficients.
