# Supplementary material for: Physical Activity- and Alcohol-dependent Association Between Air Pollution Exposure and Elevated Liver Enzyme Levels: An Elderly Panel Study
Source: PubMed Central journal article supplement — J Prev Med Public Health. 2015 May 15;48(3):151–69. doi: 10.3961/jpmph.15.014 (PMC4484281; doi:10.3961/jpmph.15.014), 2015-05-15
Supplement: jpmph-48-3-151-supple4.pdf [file jpmph-48-3-151-supple4.pdf]

**Supplemental Table 4.** Associations between air pollutant and liver enzyme levels in multi-day lag models<sup>1</sup>

|                   | Lag day | AST      |                 |         | ALT      |                 |         | γ-GTP    |                 |         |
|-------------------|---------|----------|-----------------|---------|----------|-----------------|---------|----------|-----------------|---------|
|                   |         | Estimate | 95% CI          | p-value | Estimate | 95% CI          | p-value | Estimate | 95% CI          | p-value |
| PM <sub>2.5</sub> | 1       | 0.0255   | 0.0007, 0.0503  | 0.04    | -0.0005  | -0.0315, 0.0305 | 0.97    | 0.0085   | -0.0331, 0.0502 | 0.69    |
|                   | 2       | 0.0375   | 0.0096, 0.0654  | 0.008   | 0.015    | -0.0199, 0.0499 | 0.40    | 0.0115   | -0.0354, 0.0584 | 0.63    |
|                   | 3       | 0.0467   | 0.0174, 0.0760  | 0.002   | 0.0226   | -0.0142, 0.0594 | 0.23    | 0.0348   | -0.0147, 0.0842 | 0.17    |
|                   | 4       | 0.0448   | 0.0157, 0.0740  | 0.003   | 0.0208   | -0.0157, 0.0573 | 0.26    | 0.0447   | -0.0043, 0.0937 | 0.07    |
|                   | 5       | 0.04     | 0.0106, 0.0695  | 0.008   | 0.0175   | -0.0195, 0.0544 | 0.35    | 0.0418   | -0.0078, 0.0914 | 0.10    |
|                   | 6       | 0.0391   | 0.0082, 0.0700  | 0.01    | 0.0129   | -0.0259, 0.0516 | 0.51    | 0.0298   | -0.0222, 0.0819 | 0.26    |
| NO <sub>2</sub>   | 1       | 0.0275   | -0.0001, 0.0550 | 0.05    | -0.0102  | -0.0445, 0.0240 | 0.56    | -0.0164  | -0.0620, 0.0293 | 0.48    |
|                   | 2       | 0.0443   | 0.0123, 0.0763  | 0.007   | 0.0116   | -0.0283, 0.0515 | 0.57    | -0.0083  | -0.0614, 0.0449 | 0.76    |
|                   | 3       | 0.0557   | 0.0196, 0.0919  | 0.002   | 0.0264   | -0.0186, 0.0714 | 0.25    | 0.0055   | -0.0545, 0.0656 | 0.86    |
|                   | 4       | 0.0532   | 0.0146, 0.0918  | 0.007   | 0.0239   | -0.0243, 0.0720 | 0.33    | 0.0085   | -0.0557, 0.0727 | 0.79    |
|                   | 5       | 0.0498   | 0.0085, 0.0911  | 0.02    | 0.0081   | -0.0433, 0.0595 | 0.76    | 0.0024   | -0.0662, 0.0709 | 0.94    |
|                   | 6       | 0.0541   | 0.0108, 0.0974  | 0.01    | 0.0016   | -0.0523, 0.0556 | 0.95    | -0.0012  | -0.0731, 0.0707 | 0.97    |
| O <sub>3</sub>    | 1       | 0.0099   | -0.0362, 0.056  | 0.67    | 0.0039   | -0.0539, 0.0616 | 0.89    | 0.0048   | -0.0729, 0.0824 | 0.90    |
|                   | 2       | 0.0231   | -0.0286, 0.0749 | 0.38    | 0.0174   | -0.0473, 0.0822 | 0.60    | 0.0037   | -0.0834, 0.0908 | 0.93    |
|                   | 3       | 0.0281   | -0.0254, 0.0816 | 0.30    | 0.0293   | -0.0377, 0.0962 | 0.39    | 0.0381   | -0.0520, 0.1282 | 0.41    |
|                   | 4       | 0.0342   | -0.0201, 0.0885 | 0.22    | 0.0368   | -0.0311, 0.1048 | 0.29    | 0.0698   | -0.0216, 0.1612 | 0.13    |
|                   | 5       | 0.0334   | -0.0221, 0.0911 | 0.23    | 0.0504   | -0.0205, 0.1212 | 0.16    | 0.0813   | -0.0140, 0.1765 | 0.09    |
|                   | 6       | 0.0323   | -0.0286, 0.0931 | 0.30    | 0.0574   | -0.0186, 0.1335 | 0.14    | 0.1003   | -0.0020, 0.2026 | 0.05    |
| CO                | 1       | -0.0001  | -0.0237, 0.0235 | 0.99    | -0.0114  | -0.0410, 0.0181 | 0.45    | -0.0037  | -0.0435, 0.0361 | 0.85    |
|                   | 2       | 0.0055   | -0.0223, 0.0333 | 0.70    | 0.0039   | -0.0309, 0.0387 | 0.82    | -0.0101  | -0.0569, 0.0368 | 0.67    |
|                   | 3       | 0.0085   | -0.0240, 0.0409 | 0.61    | 0.0128   | -0.0278, 0.0534 | 0.54    | -0.0092  | -0.0638, 0.0455 | 0.74    |
|                   | 4       | 0.0067   | -0.0281, 0.0414 | 0.71    | 0.0028   | -0.0406, 0.0463 | 0.90    | -0.0166  | -0.0750, 0.0419 | 0.58    |
|                   | 5       | 0.0048   | -0.0323, 0.0419 | 0.80    | -0.0040  | -0.0504, 0.0425 | 0.87    | -0.0198  | -0.0823, 0.0427 | 0.53    |
|                   | 6       | 0.0089   | -0.0305, 0.0483 | 0.66    | -0.0028  | -0.0521, 0.0465 | 0.91    | -0.0213  | -0.0876, 0.0450 | 0.53    |
| SO <sub>2</sub>   | 1       | 0.0107   | -0.0173, 0.0387 | 0.45    | -0.0103  | -0.0451, 0.0244 | 0.56    | -0.0185  | -0.0648, 0.0278 | 0.43    |
|                   | 2       | 0.0153   | -0.0153, 0.0484 | 0.33    | -0.0037  | -0.0417, 0.0343 | 0.85    | -0.0298  | -0.0805, 0.0208 | 0.25    |
|                   | 3       | 0.021    | -0.0116, 0.0535 | 0.21    | -0.0032  | -0.0437, 0.0373 | 0.88    | -0.0244  | -0.0783, 0.0286 | 0.37    |
|                   | 4       | 0.0244   | -0.0096, 0.0584 | 0.16    | 0.0028   | -0.0394, 0.0451 | 0.89    | -0.0138  | -0.0701, 0.0425 | 0.63    |
|                   | 5       | 0.0224   | -0.0137, 0.0586 | 0.22    | -0.0037  | -0.0486, 0.0412 | 0.87    | -0.0086  | -0.0685, 0.0512 | 0.78    |
|                   | 6       | 0.0217   | -0.0163, 0.0598 | 0.26    | -0.0098  | -0.0571, 0.0375 | 0.68    | -0.0090  | -0.0720, 0.0540 | 0.78    |

AST, aspartate aminotransferase; ALT, alanine aminotransferase; γ-GTP, γ-glutamyltranspeptidase; CI, confidence interval; PM<sub>2.5</sub>, particulate matter ≤2.5 μm; NO<sub>2</sub>, nitrogen dioxide; O<sub>3</sub>, ozone; CO, carbon monoxide; SO<sub>2</sub>, sulfur dioxide.

<sup>1</sup>Changes in liver enzyme levels by an interquartile range increase in the concentrations of air pollutants were estimated using a linear mixed model after adjusting for age, sex, smoking status, mean temperature, dew point, season, body mass index, alcohol consumption, and amount of exercise.
