# Supplementary material for: Physical Activity- and Alcohol-dependent Association Between Air Pollution Exposure and Elevated Liver Enzyme Levels: An Elderly Panel Study
Source: PubMed Central journal article supplement — J Prev Med Public Health. 2015 May 15;48(3):151–69. doi: 10.3961/jpmph.15.014 (PMC4484281; doi:10.3961/jpmph.15.014), 2015-05-15
Supplement: jpmph-48-3-151-supple5.pdf [file jpmph-48-3-151-supple5.pdf]

**Supplemental Table 5.** Associations between air pollutant and liver enzyme levels in unconstrained distributed lag models<sup>1</sup>

|                   | Lag day | AST      |                  |         | ALT      |                 |         | γ-GTP    |                 |         |
|-------------------|---------|----------|------------------|---------|----------|-----------------|---------|----------|-----------------|---------|
|                   |         | Estimate | 95% CI           | p-value | Estimate | 95% CI          | p-value | Estimate | 95% CI          | p-value |
| PM <sub>2.5</sub> | 0-1     | 0.0251   | 0.0003, 0.0500   | 0.05    | -0.0014  | -0.0329, 0.0301 | 0.93    | 0.0064   | -0.0355, 0.0483 | 0.74    |
|                   | 0-2     | 0.0462   | 0.0166, 0.0758   | 0.002   | 0.0204   | -0.0174, 0.0581 | 0.29    | 0.0156   | -0.0347, 0.0660 | 0.54    |
|                   | 0-3     | 0.0507   | 0.0201, 0.0812   | 0.001   | 0.02     | -0.0190, 0.0590 | 0.31    | 0.038    | -0.0137, 0.0897 | 0.15    |
|                   | 0-4     | 0.0491   | 0.0181, 0.0801   | 0.001   | 0.0189   | -0.0207, 0.0584 | 0.35    | 0.0359   | -0.0165, 0.0882 | 0.18    |
|                   | 0-5     | 0.0601   | 0.0241, 0.0960   | 0.001   | 0.0202   | -0.0258, 0.0663 | 0.39    | 0.0313   | -0.0292, 0.0919 | 0.31    |
|                   | 0-6     | 0.0565   | 0.0196, 0.0935   | 0.003   | 0.0149   | -0.0330, 0.0627 | 0.54    | 0.0153   | -0.0472, 0.0778 | 0.63    |
| NO <sub>2</sub>   | 0-1     | 0.0275   | -0.00004, 0.0551 | 0.05    | -0.0100  | -0.0443, 0.0243 | 0.57    | -0.0176  | -0.0633, 0.0281 | 0.45    |
|                   | 0-2     | 0.0485   | 0.0159, 0.0810   | 0.004   | 0.0201   | -0.0204, 0.0606 | 0.33    | 0.0025   | -0.0516, 0.0566 | 0.93    |
|                   | 0-3     | 0.0556   | 0.0190, 0.0923   | 0.003   | 0.0249   | -0.0207, 0.0706 | 0.28    | 0.0123   | -0.0486, 0.0732 | 0.69    |
|                   | 0-4     | 0.0529   | 0.0140, 0.0918   | 0.008   | 0.0202   | -0.0281, 0.0686 | 0.41    | 0.0111   | -0.0535, 0.0757 | 0.74    |
|                   | 0-5     | 0.0528   | 0.0108, 0.0949   | 0.01    | 0.0038   | -0.0484, 0.0561 | 0.88    | 0.0053   | -0.0645, 0.0751 | 0.88    |
|                   | 0-6     | 0.0614   | 0.0175, 0.1054   | 0.006   | 0.0056   | -0.0490, 0.0603 | 0.84    | 0.0043   | -0.0687, 0.0774 | 0.91    |
| O <sub>3</sub>    | 0-1     | 0.0093   | -0.0370, 0.0556  | 0.69    | 0.0015   | -0.0565, 0.0594 | 0.96    | 0.0065   | -0.0715, 0.0845 | 0.87    |
|                   | 0-2     | 0.0215   | -0.0311, 0.0740  | 0.42    | 0.0117   | -0.0540, 0.0775 | 0.73    | 0.0075   | -0.0810, 0.0960 | 0.87    |
|                   | 0-3     | 0.0252   | -0.0299, 0.0802  | 0.37    | 0.0206   | -0.0484, 0.0895 | 0.56    | 0.0327   | -0.0600, 0.1253 | 0.49    |
|                   | 0-4     | 0.0309   | -0.0260, 0.0878  | 0.29    | 0.0259   | -0.0454, 0.0971 | 0.48    | 0.0538   | -0.0419, 0.1494 | 0.27    |
|                   | 0-5     | 0.0293   | -0.0317, 0.0903  | 0.35    | 0.0405   | -0.0357, 0.1168 | 0.30    | 0.061    | -0.0414, 0.1634 | 0.24    |
|                   | 0-6     | 0.0266   | -0.0400, 0.0932  | 0.43    | 0.0444   | -0.0387, 0.1275 | 0.29    | 0.0815   | -0.0304, 0.1934 | 0.15    |
| CO                | 0-1     | -0.0002  | -0.0239, 0.0236  | 0.99    | -0.0125  | -0.0412, 0.0171 | 0.41    | -0.0037  | -0.0436, 0.0362 | 0.86    |
|                   | 0-2     | 0.0058   | -0.0226, 0.0343  | 0.69    | 0.0047   | -0.0308, 0.0402 | 0.79    | -0.0153  | -0.0631, 0.0325 | 0.53    |
|                   | 0-3     | 0.0088   | -0.0259, 0.0434  | 0.62    | 0.0054   | -0.0378, 0.0487 | 0.81    | -0.0055  | -0.0637, 0.0527 | 0.85    |
|                   | 0-4     | 0.0094   | -0.0269, 0.0456  | 0.61    | -0.0019  | -0.0470, 0.0432 | 0.93    | -0.0156  | -0.0762, 0.0451 | 0.61    |
|                   | 0-5     | 0.0092   | -0.0295, 0.0480  | 0.64    | -0.0026  | -0.0509, 0.0457 | 0.92    | -0.0160  | -0.0809, 0.0488 | 0.63    |
|                   | 0-6     | 0.0172   | -0.0241, 0.0584  | 0.41    | 0.0099   | -0.0413, 0.0611 | 0.70    | -0.0196  | -0.0887, 0.0495 | 0.58    |
| SO <sub>2</sub>   | 0-1     | 0.0106   | -0.0174, 0.0386  | 0.46    | -0.0105  | -0.0453, 0.0242 | 0.55    | -0.0188  | -0.0650, 0.0275 | 0.43    |
|                   | 0-2     | 0.0179   | -0.0131, 0.0489  | 0.26    | 0.0033   | -0.0352, 0.0418 | 0.87    | -0.0271  | -0.0785, 0.0242 | 0.30    |
|                   | 0-3     | 0.0232   | -0.0099, 0.0563  | 0.17    | -0.0024  | -0.0434, 0.0387 | 0.91    | -0.0155  | -0.0703, 0.0392 | 0.58    |
|                   | 0-4     | 0.0255   | -0.0091, 0.0601  | 0.15    | 0.0057   | -0.0372, 0.0486 | 0.79    | -0.0063  | -0.0635, 0.0509 | 0.83    |
|                   | 0-5     | 0.0182   | -0.0194, 0.0557  | 0.34    | -0.0158  | -0.0623, 0.0307 | 0.50    | -0.0085  | -0.0707, 0.0536 | 0.79    |
|                   | 0-6     | 0.019    | -0.0201, 0.0581  | 0.34    | -0.0190  | -0.0674, 0.0293 | 0.44    | -0.0118  | -0.0765, 0.0529 | 0.72    |

AST, aspartate aminotransferase; ALT, alanine aminotransferase; γ-GTP, γ-glutamyltranspeptidase; CI: confidence interval; PM<sub>2.5</sub>, particulate matter ≤2.5 μm; NO<sub>2</sub>, nitrogen dioxide; O<sub>3</sub>, ozone; CO, carbon monoxide; SO<sub>2</sub>, sulfur dioxide.

<sup>1</sup>Changes in liver enzyme levels by an interquartile range increase of air pollutants were estimated using a linear mixed model after adjusting for age, sex, smoking status, mean temperature, dew point, season, body mass index, alcohol consumption, and amount of exercise.
