# Supplementary material for: Physical Activity- and Alcohol-dependent Association Between Air Pollution Exposure and Elevated Liver Enzyme Levels: An Elderly Panel Study
Source: PubMed Central journal article supplement — J Prev Med Public Health. 2015 May 15;48(3):151–69. doi: 10.3961/jpmph.15.014 (PMC4484281; doi:10.3961/jpmph.15.014), 2015-05-15
Supplement: jpmph-48-3-151-supple6.pdf [file jpmph-48-3-151-supple6.pdf]

**Supplemental Table 6.** Percent change in liver enzyme levels with an interquartile increase in the concentrations of air pollutants in single-day lag models<sup>1</sup> after inverse probability weighting for follow-up visits.

|                   | IQR                    | AST      |           |         | ALT      |           |         | γ-GTP    |           |         |
|-------------------|------------------------|----------|-----------|---------|----------|-----------|---------|----------|-----------|---------|
|                   |                        | Estimate | 95% CI    | p-value | Estimate | 95% CI    | p-value | Estimate | 95% CI    | p-value |
| PM <sub>2.5</sub> | 13.2 μg/m <sup>3</sup> | 3.7      | 1.5, 5.8  | <0.001  | 3.6      | 0.6, 6.6  | 0.02    | 6.4      | 2.8, 10.1 | <0.001  |
| NO <sub>2</sub>   | 14.4 ppb               | 4.2      | 1.7, 6.8  | <0.001  | 4.1      | 1.1, 7.3  | 0.007   | -2.3     | -6.2, 1.7 | 0.25    |
| O <sub>3</sub>    | 38.5 ppb               | 2.9      | -0.3, 6.3 | 0.08    | 2.4      | -1.2, 6.1 | 0.19    | 5.8      | 0.9, 10.9 | 0.02    |
| CO                | 4.0 ppm                | 1.3      | -1.0, 3.6 | 0.28    | 2.7      | -0.1, 5.7 | 0.06    | 0.3      | -3.7, 4.4 | 0.88    |
| SO <sub>2</sub>   | 2.3 ppb                | 2.6      | 0.2, 5.1  | 0.04    | -1.6     | -4.7, 1.5 | 0.31    | -2.7     | -7.2, 1.5 | 0.20    |

IQR, interquartile range; AST, aspartate aminotransferase; ALT, alanine aminotransferase; γ-GTP, γ-glutamyltranspeptidase; CI, confidence interval; PM<sub>2.5</sub>, particulate matter ≤2.5 μm; NO<sub>2</sub>, nitrogen dioxide; O<sub>3</sub>, ozone; CO, carbon monoxide; SO<sub>2</sub>, sulfur dioxide; ppb, parts per billion; ppm, parts per million.

<sup>1</sup>Associations with AST are shown for NO<sub>2</sub>, O<sub>3</sub>, and CO on lag day 2 and for PM<sub>2.5</sub> and SO<sub>2</sub> on lag day 3. Associations with ALT are shown for SO<sub>2</sub> on lag day 1; for PM<sub>2.5</sub>, NO<sub>2</sub>, and CO on lag day 2; and for O<sub>3</sub> on lag day 5. Associations with γ-GTP are shown for NO<sub>2</sub> and SO<sub>2</sub> on day 1, for PM<sub>2.5</sub> on lag day 3, and for O<sub>3</sub> and CO on lag day 4. All models were adjusted for age, sex, smoking status, mean temperature, dew point, season, body mass index, alcohol consumption, and amount of exercise.
