# Supplementary material for: Physical Activity- and Alcohol-dependent Association Between Air Pollution Exposure and Elevated Liver Enzyme Levels: An Elderly Panel Study
Source: PubMed Central journal article supplement — J Prev Med Public Health. 2015 May 15;48(3):151–69. doi: 10.3961/jpmph.15.014 (PMC4484281; doi:10.3961/jpmph.15.014), 2015-05-15
Supplement: jpmph-48-3-151-supple7.pdf [file jpmph-48-3-151-supple7.pdf]

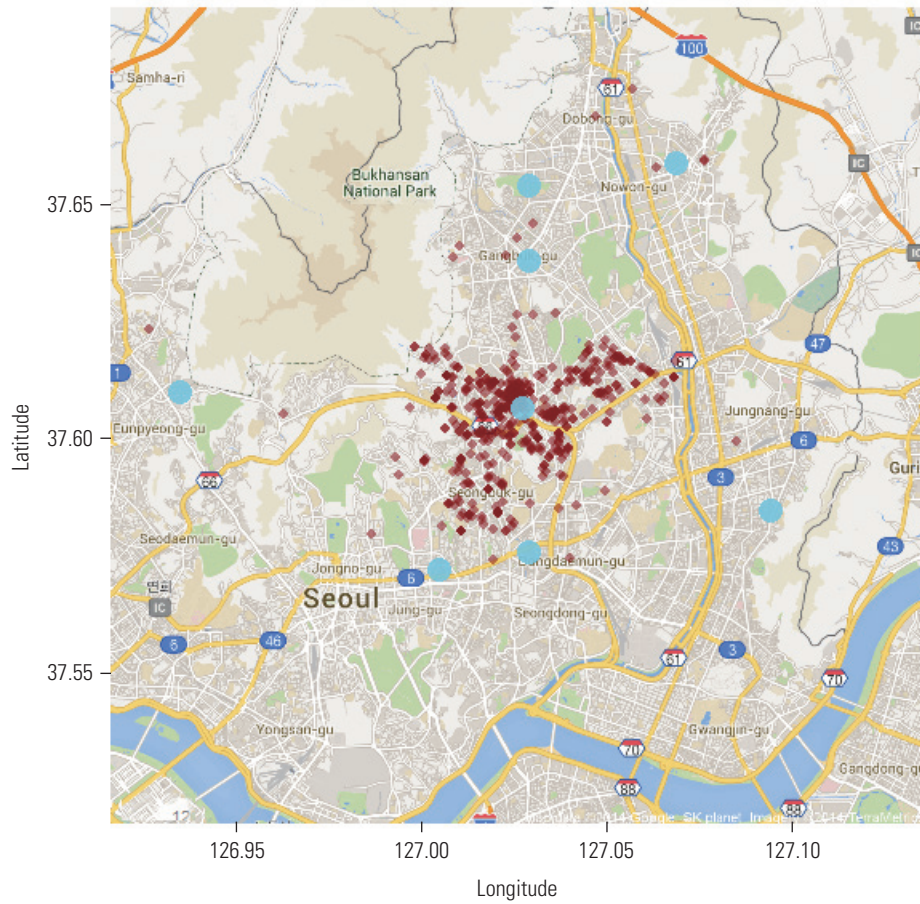

**Supplemental Figure 1.** Map indicating the monitoring sites and address of the participants. Blue circle, monitoring sites; Red dot, address of the participant.
