# Supplementary material for: Physical Activity- and Alcohol-dependent Association Between Air Pollution Exposure and Elevated Liver Enzyme Levels: An Elderly Panel Study
Source: PubMed Central journal article supplement — J Prev Med Public Health. 2015 May 15;48(3):151–69. doi: 10.3961/jpmph.15.014 (PMC4484281; doi:10.3961/jpmph.15.014), 2015-05-15
Supplement: jpmph-48-3-151-supple8.pdf [file jpmph-48-3-151-supple8.pdf]

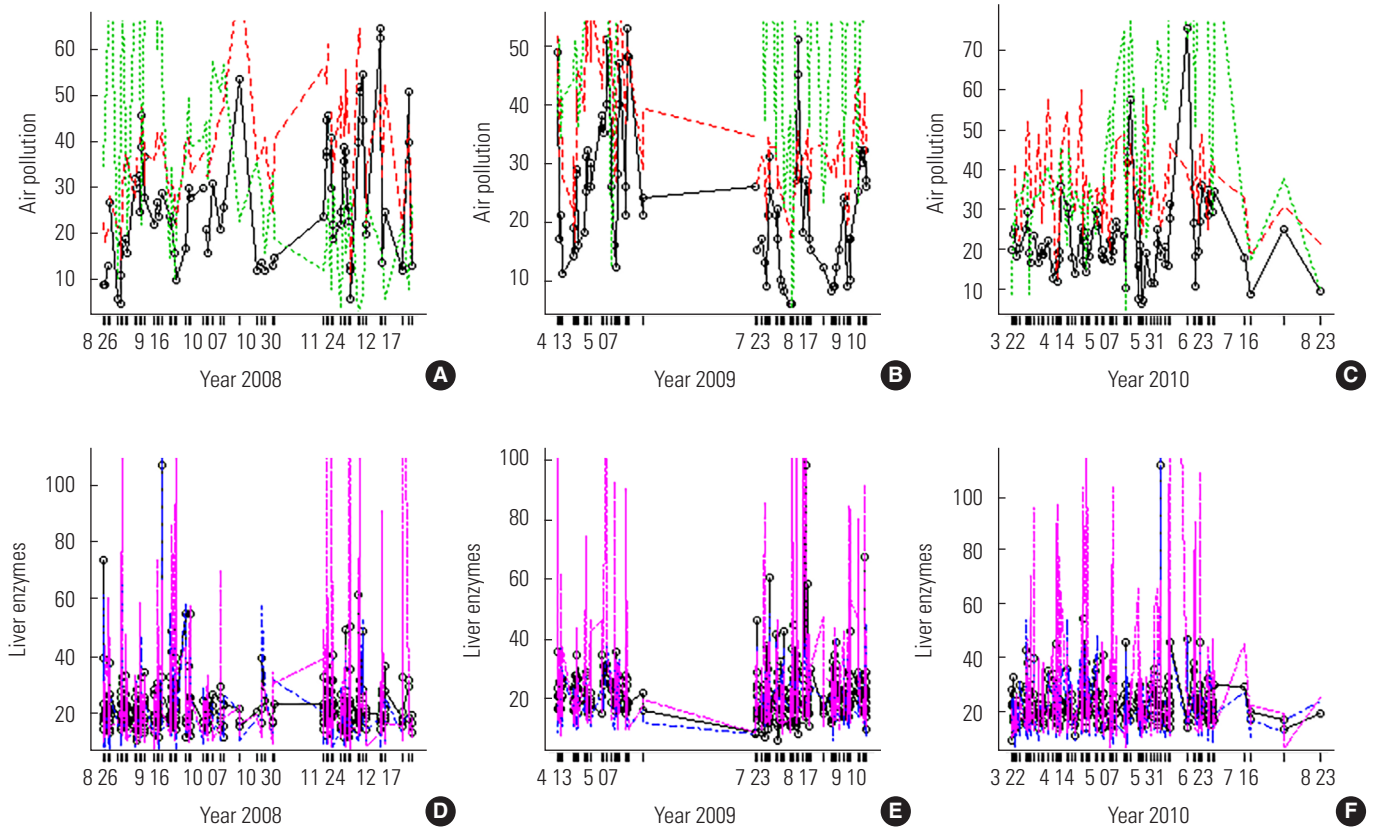

**Supplemental Figure 2.** Daily distribution of particulate matter  $\leq 2.5 \mu\text{m}$  ( $\text{PM}_{2.5}$ ), nitrogen dioxide ( $\text{NO}_2$ ), ozone ( $\text{O}_3$ ) concentrations (A-C), and alanine aminotransferase (AST), alanine aminotransferase (ALT), and  $\gamma$ -glutamyltranspeptidase ( $\gamma$ -GTP) levels (D-F) during the study period, 2008-2010.  $\text{PM}_{2.5}$ , black;  $\text{NO}_2$ , red;  $\text{O}_3$ , green; AST, black; ALT, blue;  $\gamma$ -GTP, purple.
