# Supplementary material for: Physical Activity- and Alcohol-dependent Association Between Air Pollution Exposure and Elevated Liver Enzyme Levels: An Elderly Panel Study
Source: PubMed Central journal article supplement — J Prev Med Public Health. 2015 May 15;48(3):151–69. doi: 10.3961/jpmph.15.014 (PMC4484281; doi:10.3961/jpmph.15.014), 2015-05-15
Supplement: jpmph-48-3-151-supple9.pdf [file jpmph-48-3-151-supple9.pdf]

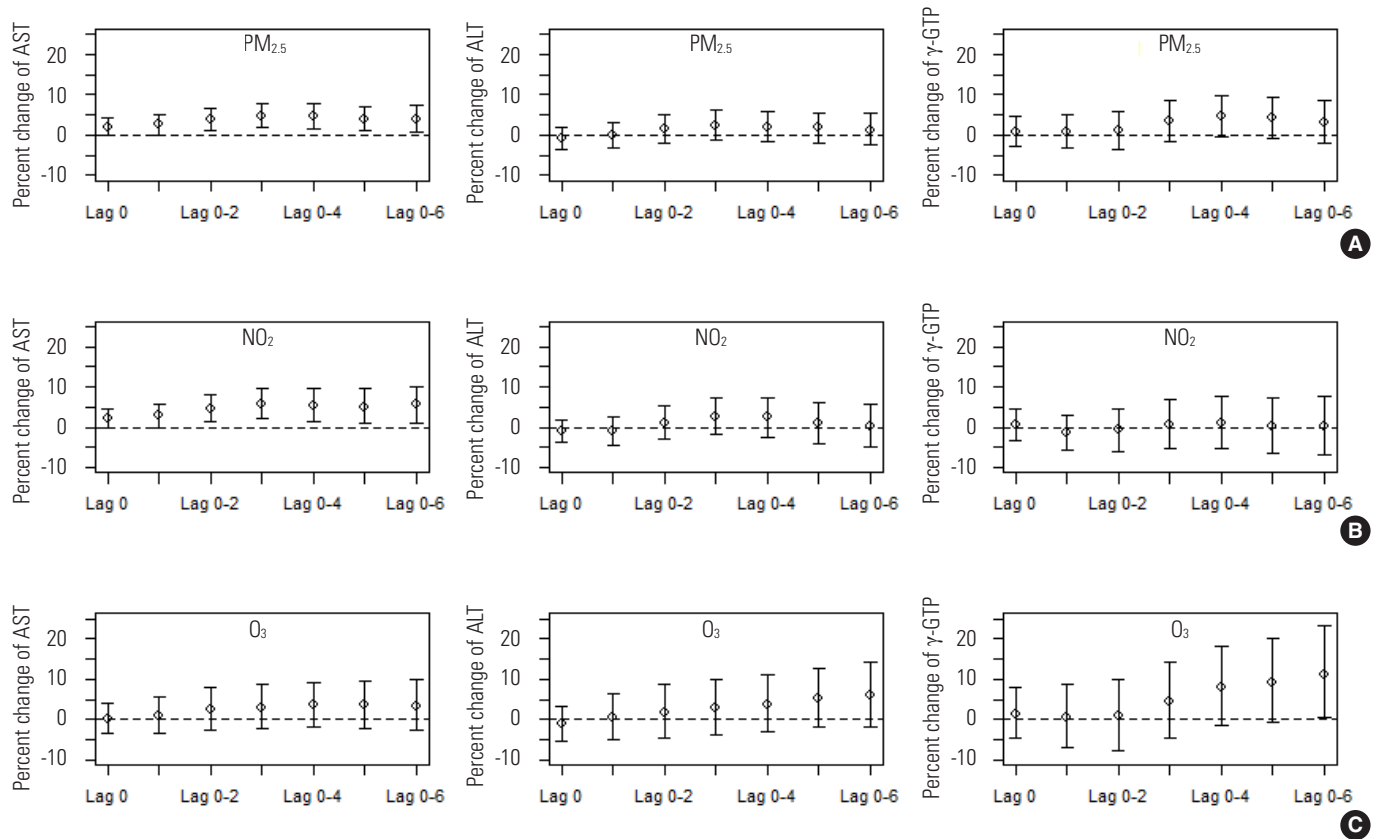

**Supplemental Figure 3.** Associations of particulate matter  $\leq 2.5 \mu\text{m}$  (PM<sub>2.5</sub>), nitrogen dioxide (NO<sub>2</sub>), and ozone (O<sub>3</sub>) concentrations with alanine aminotransferase (AST), alanine aminotransferase (ALT), and  $\gamma$ -glutamyltranspeptidase ( $\gamma$ -GTP) levels in multi-day lag models. The percent changes in the concentrations of AST, ALT, and  $\gamma$ -GTP by interquartile range increases of (A) PM<sub>2.5</sub>, (B) NO<sub>2</sub>, and (C) O<sub>3</sub> were estimated by linear mixed models adjusted for age, sex, smoking status, mean temperature, dew point, season, body mass index, alcohol consumption, and amount of exercise. For details, see also Supplemental Table 4.
