# Supplementary material for: Physical Activity- and Alcohol-dependent Association Between Air Pollution Exposure and Elevated Liver Enzyme Levels: An Elderly Panel Study
Source: PubMed Central journal article supplement — J Prev Med Public Health. 2015 May 15;48(3):151–69. doi: 10.3961/jpmph.15.014 (PMC4484281; doi:10.3961/jpmph.15.014), 2015-05-15
Supplement: jpmph-48-3-151-supple10.pdf [file jpmph-48-3-151-supple10.pdf]

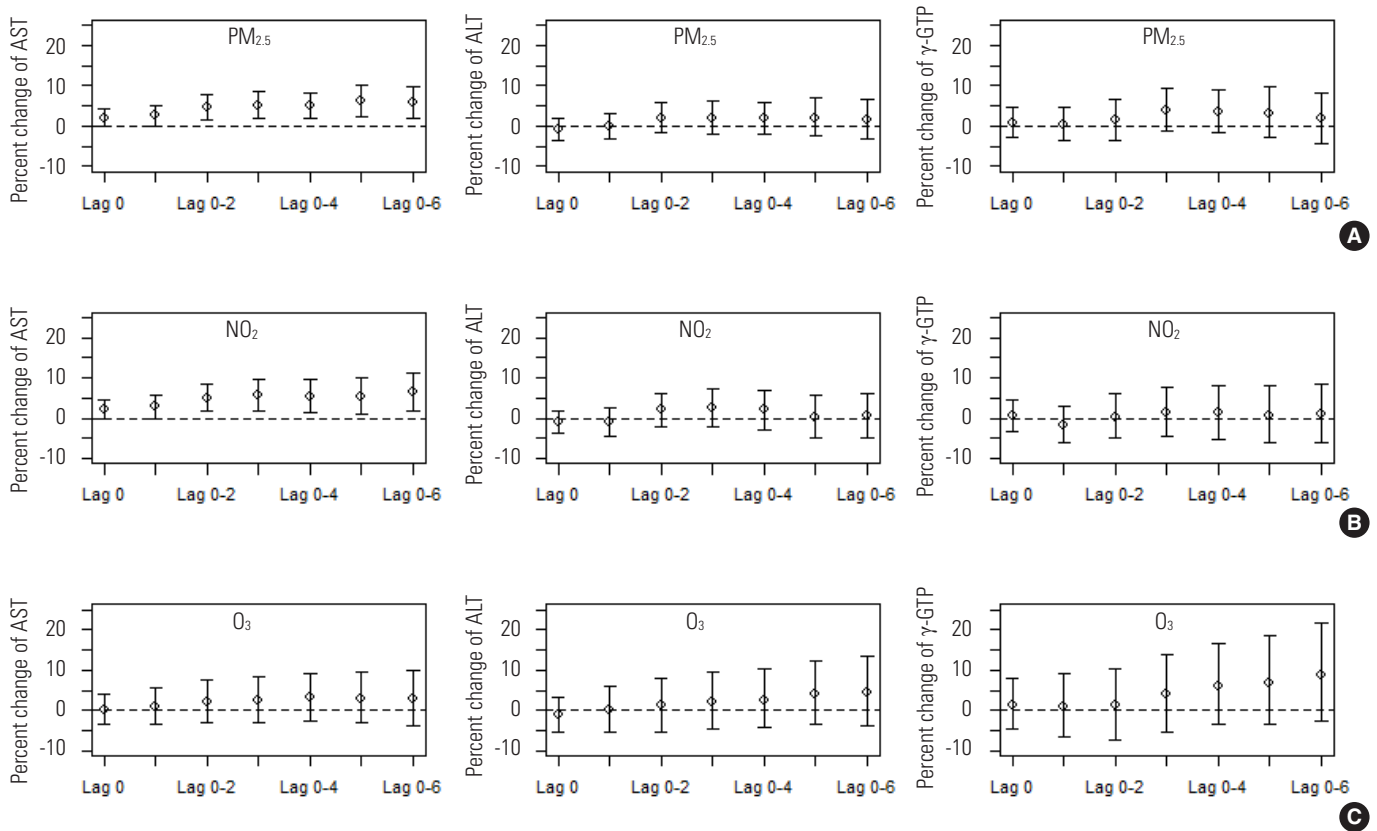

**Supplemental Figure 4.** Associations of particulate matter  $\leq 2.5 \mu\text{m}$  ( $\text{PM}_{2.5}$ ), nitrogen dioxide ( $\text{NO}_2$ ), and ozone ( $\text{O}_3$ ) with alanine aminotransferase (AST), alanine aminotransferase (ALT), and  $\gamma$ -glutamyltranspeptidase ( $\gamma$ -GTP) in unconstrained distributed lag models. Percent changes in the levels of AST, ALT, and  $\gamma$ -GTP by interquartile range increase of (A)  $\text{PM}_{2.5}$ , (B)  $\text{NO}_2$ , and (C)  $\text{O}_3$  concentrations were estimated by linear mixed models adjusted for age, sex, smoking status, mean temperature, dew point, season, body mass index, alcohol consumption, and amount of exercise. For details, see also Supplemental Table 5.
